# Supplementary material for: No Such Thing as a Free-Rider? Understanding Drivers of Childhood and Adult Vaccination through a Multicountry Discrete Choice Experiment
Source: Vaccines (Basel). 2021 Mar 16;9(3):264. doi: 10.3390/vaccines9030264 (PMC7999942; doi:10.3390/vaccines9030264)
Supplement: Supplementary file 1 [file vaccines-09-00264-s001.zip]

Archive with 4 entries (4 files):
- supplementary_material_S1.pdf
- __MACOSX/._supplementary_material_S1.pdf
- supplementary_material_S2_S3.pdf
- __MACOSX/._supplementary_material_S2_S3.pdf
